# Supplementary material for: Flexible Ag–C60nano-biosensors based on surface plasmon coupled emission for clinical and forensic applications
Source: Royal Society of Chemistry journal article supplement (doi:10.1039/c5cp04268b), 2015-01-01
Supplement: c5cp04268b1.pdf [file c5cp04268b1.pdf]

Supporting Information

**Flexible Ag-C<sub>60</sub> Nano-Biosensors based on Surface Plasmon Coupled Emission for Clinical and Forensic Applications**

Pradyumna Mulpur<sup>†</sup>, Sairam Yadavilli<sup>†</sup>, Praharsha Mulpur<sup>§</sup>, Neeharika Kondiparthi<sup>§</sup>,  
Bishwambhar Sengupta<sup>‡¶</sup>, Apparao M. Rao<sup>‡¶</sup>, Ramakrishna Podila<sup>‡¶\*</sup> and Venkataramaniah  
Kamiseti<sup>‡\*</sup>

<sup>†</sup> Department of Physics, Sri Sathya Sai Institute of Higher Learning, Prasanthi Nilayam 515134,  
India

<sup>§</sup>Department of Clinical Microbiology, Sunshine Hospitals, Secunderabad, 500003, India

<sup>‡</sup>Department of Physics and Astronomy and <sup>¶</sup>Clemson Nanomaterials Center, COMSET,  
Clemson University, Clemson, South Carolina 29634, United States

**\*Corresponding Authors:**

Prof. Venkataramaniah Kamiseti  
Email: kvenkataramaniah@sssihl.edu.in  
Telephone: +91 9490474571

Dr. Ramakrishna Podila  
Email: rpodila@g.clemson.edu  
Telephone: (864) 656 – 4447  
Fax: (864) 656 – 0805

**Mobile phone based sensing of SPCE signals:** Encouraged by the high selectivity and sensitivity exhibited by our GLAG/FLAG-C<sub>60</sub> platforms for sensing bacteria (cf. Fig. 4) and sperm (cf. Fig. 6), we explored the possibility of sensing them in RLS setting using the camera on iPhone© to record the SPCE signals through SpectraSnapp© application (developed by the American Physical Society and available freely on the iTunes© store). In our setup, an iPhone 6 (which served as the detector) and a 1 cm<sup>2</sup> piece of a compact disc (which served as the diffraction grating) were assembled into a smartphone-based biosensor using black chart paper (which cut out ambient light). For the study, we employed GLAG/FLAG-C<sub>60</sub> substrates coated with 10 µM concentration of RhB, which was excited with a green laser (532 nm). By a simple point-and-shoot technique, we captured the SPCE orange RhB spectral band (Fig. 6) at 580 nm. It is important to note that the orange band captured in the image moves from a light orange to red color gradient, which corresponds to RhB emission profile from ~540-620 nm that can be seen in Figs. 3 and 5.

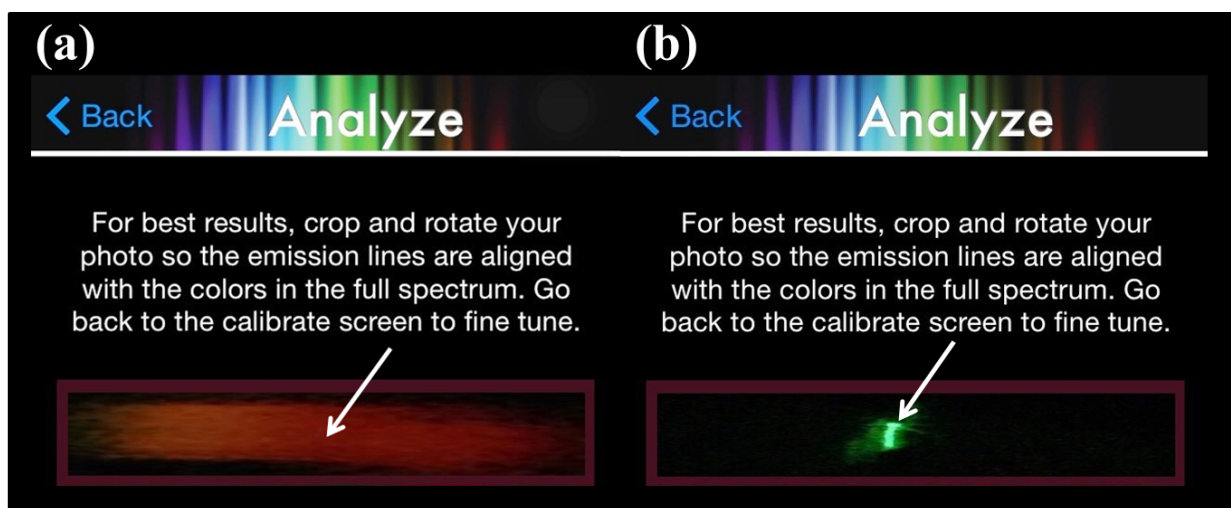

**Figure S1:** An iPhone 6 screen-shot representing: (a) the recorded SPCE spectral emission from micro-molar concentration of RhB on a FLAG-C<sub>60</sub> substrate that corresponds to SPCE signal @580 nm and (b) a green spectral band corresponding to a 532 nm excitation source in the absence of RhB fluorophore on the FLAG-C<sub>60</sub> substrate.
